# Supplementary material
Source: publisher figshare collection journal article supplement (https://acs.figshare.com/ndownloader/files/4133290)
Supplement: Supplementary file 1 [file 4133290]

## Supporting Information

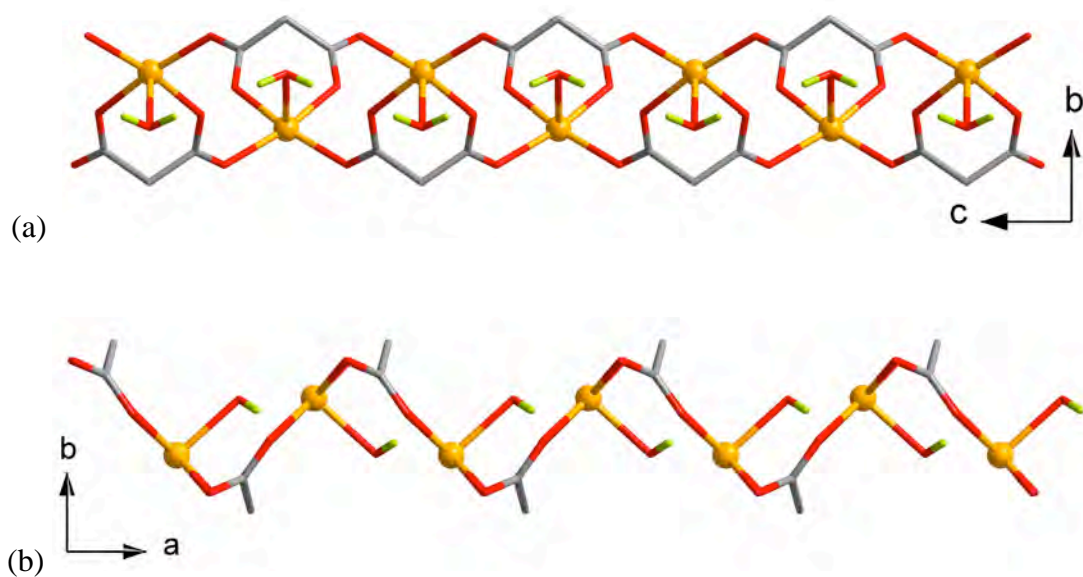

**Figure S1.** A view of the Rmal-Mn(II) layers in **1-4**, along the crystallographic *a* (a) and *c* axes (b).

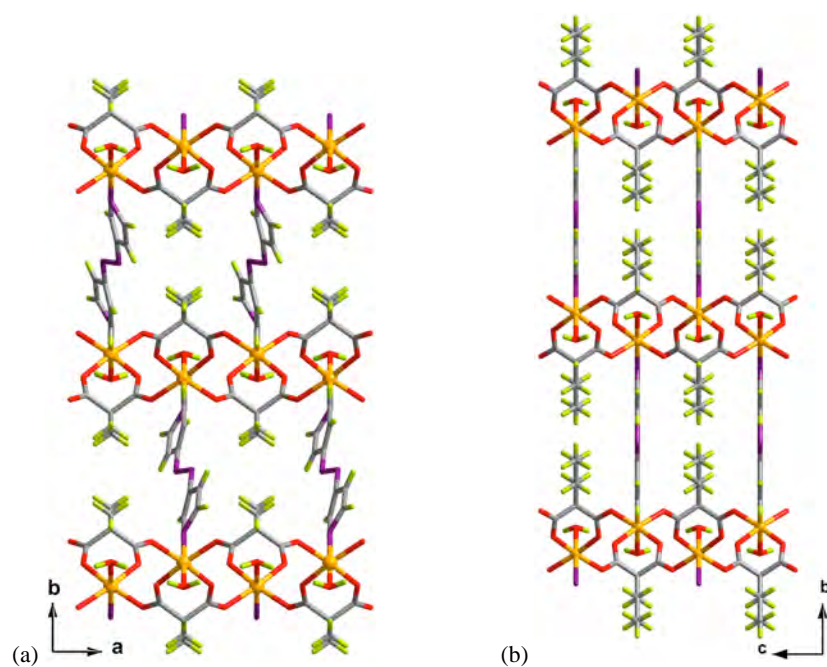

**Figure S2.** Perspective views of the crystal packing of **2** (a) and **3** (b) along the crystallographic *c* (2) and *a* axes (3).

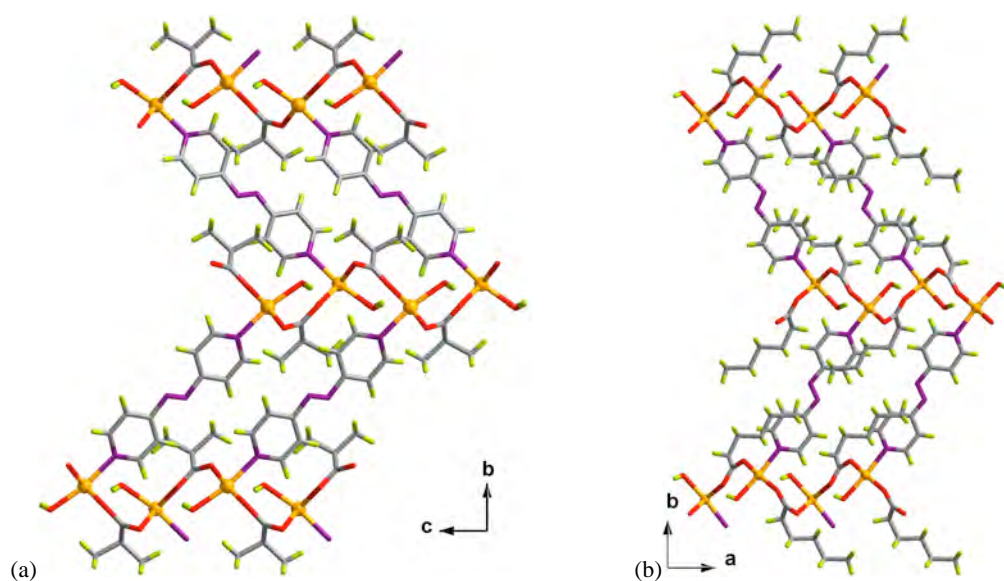

**Figure S3.** A view of the 3D structure of the compounds **2** (a) and **3** (b) along the crystallographic *a* (**2**) and *c* axes (**3**) showing the corrugated layers of the carboxylate-bridged manganese(II) ions linked through the bis-monodentate azpy ligand.

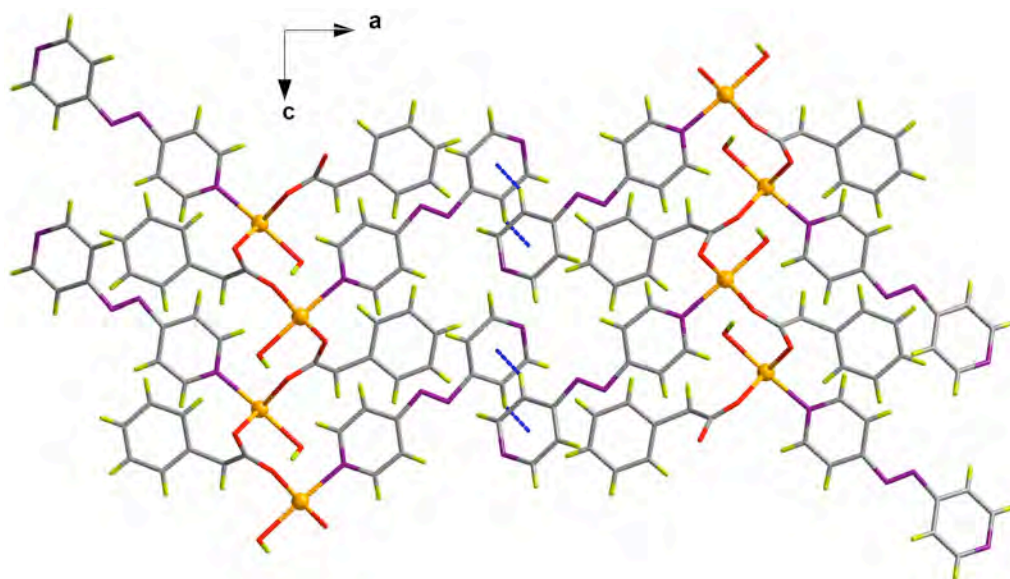

**Figure S4.** Views of the packing **4** along the crystallographic *b* axis showing the C-H  $\cdots \pi$  type interactions (blue dashed lines).

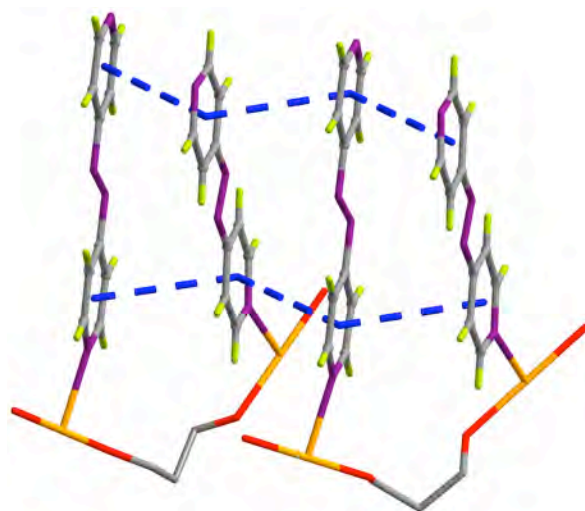

**Figure S5.** Detail of the  $\pi$ - $\pi$  type interactions (blue dashed lines) present in **5**.

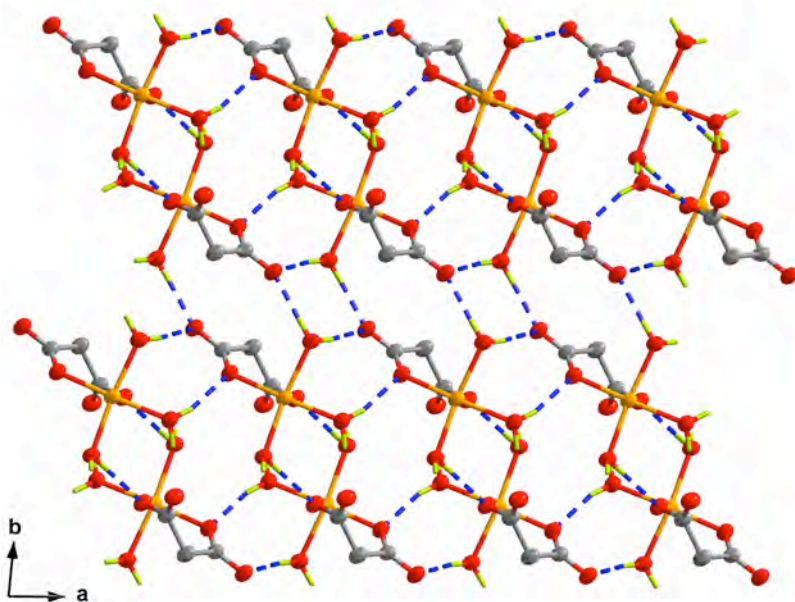

**Figure S6.** Perspective view of the plane build by the hydrogen bonds (blue and fragmented bonds), along the crystallographic  $c$  axis. The azpy and the benzyl groups have been removed for clarity.

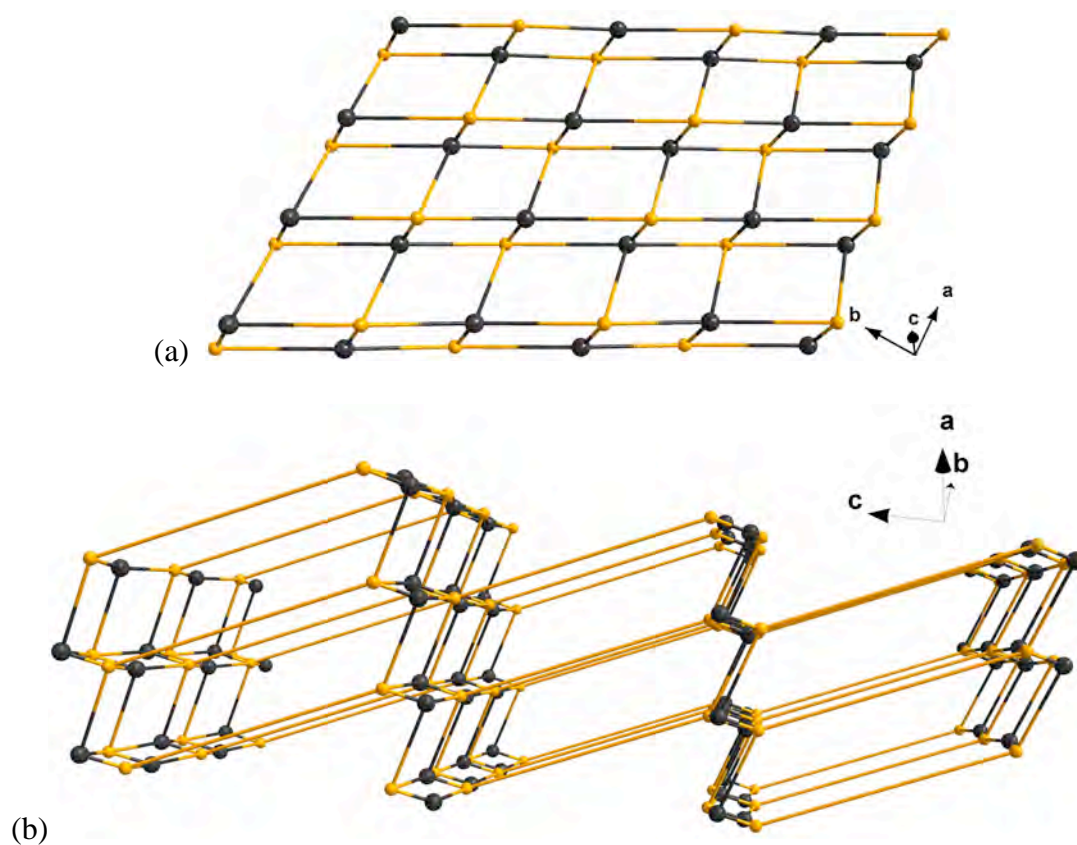

**Figure S7.** (a) Detail of the  $[4^4.6^2]$  layer in **6** built through the hydrogen bonds [the black nodes represent the Rmal ligand and the yellow ones the Mn(II) atoms]. (b) Topological representation of the three-dimensional **tcs**-type topology in **6**. The yellow bonds correspond to the manganese-manganese bridges through the hydrogen bonds involving the azpy ligand, whereas the black and yellow ones correspond to the hydrogen bonds which links the aqua-manganese and the Rmal-Mn(II) units.



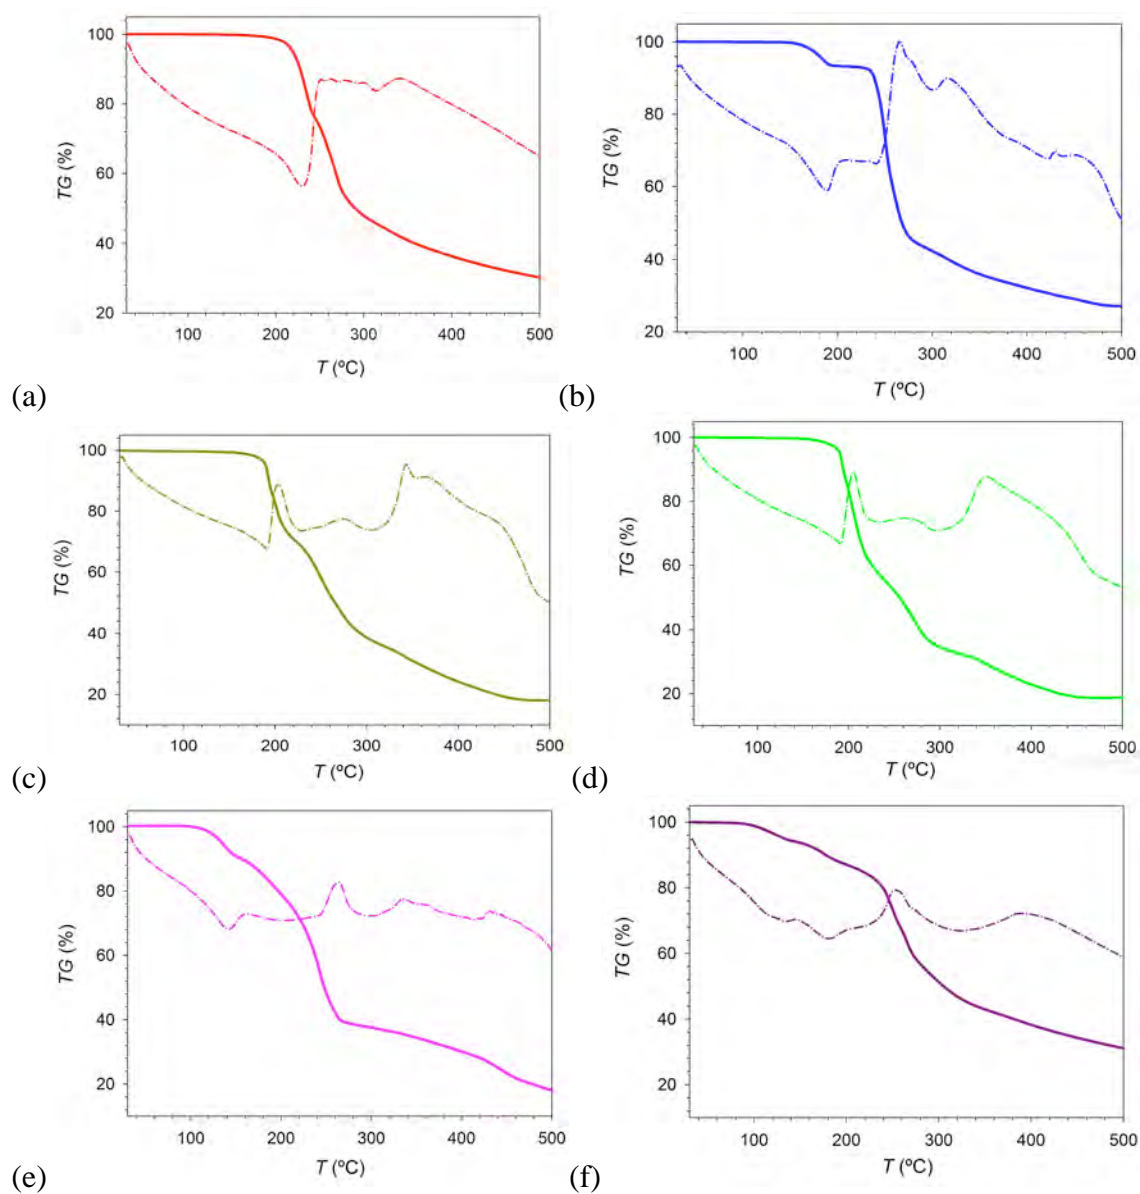

**Figure S8.** TG/DTG-DTA curves of **1** (a), **2** (b), **3** (c), **4** (d), **5** (e) and **6** (f). TG = mass loss (percent) and DTA =  $\Delta T$  ( $\mu V$ ) ( $\downarrow$  endo and  $\uparrow$  exo).

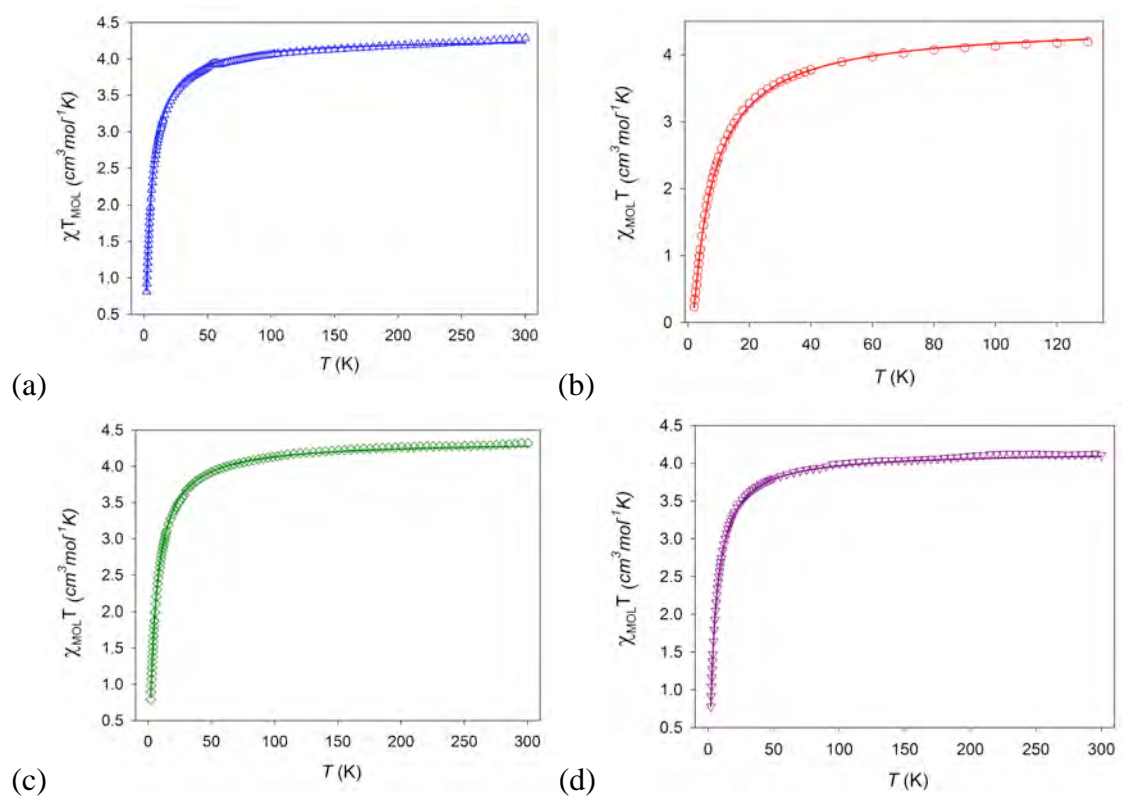

**Figure S9.**  $\chi_M T$  vs.  $T$  plots for complexes **1** (a), **2** (b), **3** (c) and **4** (d). The solid line is the best-fit.

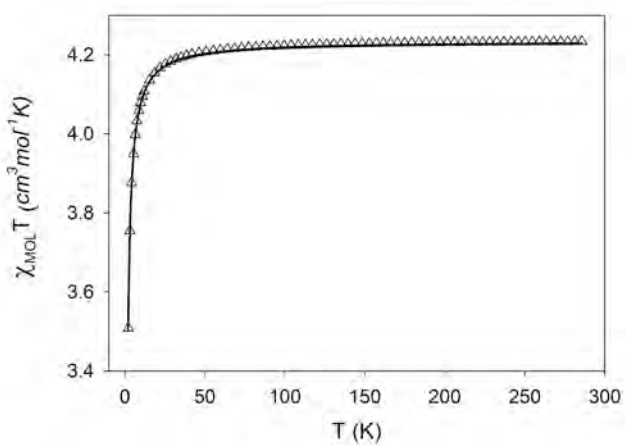

**Figure S10.**  $\chi_M T$  vs.  $T$  plot for **5**. The solid line is the best-fit.
